# Supplementary material for: Genomic DNA variation confirmed Seriola lalandi comprises three different populations in the Pacific, but with recent divergence
Source: PubMed Central journal article supplement (PMC5571200; doi:10.1038/s41598-017-07419-x), 2017-08-24
Supplement: 41598_2017_7419_MOESM1_ESM.pdf [file 41598_2017_7419_MOESM1_ESM.pdf]

## Supplementary information

**Genomic DNA variation confirmed *Seriola lalandi* is three different populations in the Pacific, but with recent divergence**

H.K.A. Premachandra<sup>a</sup>, Fabiola Lafarga-De la Cruz<sup>b</sup>, Yutaka Takeuchi<sup>c</sup>, Adam Miller<sup>d</sup>, Stewart Fielder<sup>e</sup>,  
Wayne O'Connor<sup>e</sup>, Celine H. Frère<sup>a</sup>, Nguyen Hong Nguyen<sup>a</sup>, Ido Bar<sup>a</sup>, Wayne Knibb<sup>a</sup>, \*

**Supplementary Table 1.** All the variable sites of haplotypes based on published and present mtDNA COI sequences. Unique nucleotide positions which separate the Northern and Southern Hemisphere, the Northwest Pacific from others and Northeast Pacific from others were shaded in black, dark grey and light grey, respectively.

| Variable site |           |                      | 6 | 9 | 24 | 27 | 39 | 45 | 51 | 74 | 81 | 84 | 117 | 126 | 129 | 135 | 138 | 186 | 225 | 261 | 267 | 276 | 288 | 294 | 315 | 318 | 348 | 366 | 384 | 387 | 390 | 447 | 459 | 468 | 469 | 489 | 495 | 498 | 501 | 508 | 516 | 525 | 582 |   |   |   |
|---------------|-----------|----------------------|---|---|----|----|----|----|----|----|----|----|-----|-----|-----|-----|-----|-----|-----|-----|-----|-----|-----|-----|-----|-----|-----|-----|-----|-----|-----|-----|-----|-----|-----|-----|-----|-----|-----|-----|-----|-----|-----|---|---|---|
| Haplotype     | Frequency | Country/Region       | T | G | A  | G  | T  | T  | A  | T  | A  | G  | G   | G   | T   | G   | C   | C   | T   | A   | G   | G   | C   | G   | T   | C   | C   | A   | A   | T   | T   | T   | T   | A   | C   | G   | A   | A   | T   | T   | C   | A   | G   |   |   |   |
| Hap_1         | 3.59%     | Japan, China         | . | A | .  | .  | .  | .  | .  | .  | G  | .  | A   | .   | .   | .   | T   | .   | .   | .   | A   | .   | .   | .   | .   | .   | .   | .   | G   | .   | C   | .   | C   | T   | .   | .   | G   | .   | C   | C   | T   | .   | A   |   |   |   |
| Hap_2         | 0.85%     | Japan                | . | A | G  | .  | .  | .  | .  | .  | G  | .  | A   | .   | .   | .   | T   | .   | .   | .   | A   | .   | .   | .   | .   | .   | .   | .   | G   | .   | C   | .   | C   | T   | .   | .   | G   | .   | C   | C   | T   | .   | A   |   |   |   |
| Hap_3         | 0.17%     | Japan                | . | A | .  | .  | .  | .  | .  | .  | G  | .  | A   | .   | .   | .   | T   | .   | .   | .   | A   | .   | .   | .   | T   | .   | .   | G   | .   | C   | .   | C   | T   | .   | .   | G   | .   | C   | C   | T   | .   | A   |     |   |   |   |
| Hap_4         | 14.87%    | USA, Mexico          | . | A | .  | .  | .  | .  | G  | .  | .  | .  | A   | .   | .   | .   | T   | .   | .   | G   | .   | .   | .   | .   | .   | .   | T   | .   | G   | .   | .   | .   | C   | T   | .   | .   | G   | G   | .   | C   | T   | G   | .   |   |   |   |
| Hap_5         | 3.93%     | USA, Mexico          | . | A | .  | .  | .  | .  | G  | .  | .  | .  | A   | .   | .   | .   | T   | .   | .   | G   | .   | .   | .   | .   | .   | .   | T   | .   | G   | .   | .   | .   | C   | T   | .   | .   | G   | G   | .   | C   | T   | G   | .   |   |   |   |
| Hap_6         | 1.20%     | USA, Mexico          | . | A | .  | .  | .  | .  | G  | .  | .  | .  | A   | .   | .   | .   | T   | .   | C   | .   | .   | .   | .   | .   | .   | .   | T   | .   | G   | .   | .   | .   | C   | T   | .   | .   | G   | .   | C   | T   | G   | .   |     |   |   |   |
| Hap_7         | 0.85%     | Mexico               | . | A | .  | .  | .  | .  | G  | .  | .  | .  | A   | .   | .   | .   | T   | .   | .   | .   | .   | .   | .   | .   | .   | .   | T   | .   | G   | .   | .   | .   | C   | T   | .   | .   | G   | G   | .   | C   | T   | G   | .   |   |   |   |
| Hap_8         | 0.17%     | Mexico               | . | A | .  | .  | .  | .  | G  | .  | .  | .  | A   | .   | .   | .   | T   | .   | .   | G   | .   | A   | .   | .   | .   | .   | T   | .   | G   | .   | .   | .   | C   | T   | .   | .   | G   | G   | .   | C   | T   | G   | .   |   |   |   |
| Hap_9         | 0.17%     | Mexico               | . | A | .  | .  | .  | .  | G  | .  | .  | .  | A   | .   | .   | .   | T   | .   | .   | G   | .   | .   | .   | .   | .   | .   | T   | .   | G   | .   | .   | .   | C   | T   | .   | .   | C   | G   | .   | C   | T   | G   | .   |   |   |   |
| Hap_10        | 0.85%     | Chile                | . | . | .  | .  | .  | .  | .  | .  | .  | .  | .   | .   | .   | .   | .   | .   | .   | .   | .   | .   | .   | .   | .   | .   | .   | .   | .   | .   | C   | .   | .   | .   | .   | .   | .   | .   | .   | .   | .   | .   | .   | . |   |   |
| Hap_11        | 61.71%    | Chile, NSW, SA, NZ   | . | . | .  | .  | .  | .  | .  | .  | .  | .  | .   | .   | .   | .   | .   | .   | .   | .   | .   | .   | .   | .   | .   | .   | .   | .   | .   | .   | .   | .   | .   | .   | .   | .   | .   | .   | .   | .   | .   | .   | .   | . | . |   |
| Hap_12        | 3.59%     | Chile, NSW           | . | . | .  | .  | .  | .  | .  | .  | .  | .  | A   | .   | .   | .   | .   | .   | .   | .   | .   | .   | .   | .   | .   | .   | .   | .   | .   | .   | .   | .   | .   | .   | .   | .   | .   | .   | .   | .   | .   | .   | .   | . | . |   |
| Hap_13        | 0.85%     | Chile                | . | . | .  | .  | .  | .  | .  | .  | .  | .  | .   | .   | .   | .   | .   | .   | .   | .   | .   | .   | .   | .   | A   | .   | .   | .   | .   | .   | .   | .   | .   | .   | .   | .   | .   | .   | .   | .   | .   | .   | .   | . | . |   |
| Hap_14        | 2.91%     | Chile, NSW, SA, S_Af | . | A | .  | .  | .  | .  | .  | .  | .  | .  | .   | .   | .   | .   | T   | .   | .   | .   | .   | .   | .   | .   | .   | .   | .   | .   | .   | .   | .   | .   | .   | .   | .   | .   | .   | .   | .   | .   | .   | .   | .   | . | . |   |
| Hap_15        | 0.34%     | Chile                | . | . | .  | .  | .  | .  | .  | .  | .  | .  | .   | .   | .   | .   | .   | .   | .   | .   | .   | .   | .   | .   | .   | .   | .   | .   | .   | .   | .   | .   | .   | .   | .   | .   | .   | .   | .   | .   | .   | C   | .   | . | . |   |
| Hap_16        | 0.34%     | Chile, NSW           | . | . | .  | .  | .  | .  | .  | .  | .  | .  | A   | .   | .   | .   | .   | .   | .   | .   | .   | .   | .   | .   | .   | .   | .   | .   | .   | .   | .   | .   | .   | .   | .   | .   | .   | .   | .   | .   | .   | .   | .   | . | G | . |
| Hap_17        | 0.17%     | Chile                | . | . | .  | .  | .  | .  | .  | .  | .  | .  | .   | .   | .   | .   | .   | .   | .   | .   | .   | .   | .   | .   | .   | .   | .   | .   | .   | .   | .   | .   | .   | .   | .   | .   | .   | .   | A   | .   | .   | .   | .   | . | . |   |
| Hap_18        | 0.17%     | Chile                | . | . | .  | .  | .  | .  | .  | .  | .  | .  | .   | .   | .   | A   | .   | .   | .   | .   | .   | .   | .   | .   | .   | .   | .   | .   | .   | .   | .   | .   | .   | .   | .   | .   | .   | .   | .   | .   | .   | .   | .   | . | . | . |
| Hap_19        | 0.17%     | Chile                | . | . | .  | .  | .  | .  | .  | .  | .  | .  | .   | .   | .   | .   | T   | .   | .   | .   | .   | .   | .   | .   | .   | .   | .   | .   | .   | .   | .   | .   | .   | .   | .   | .   | .   | .   | .   | .   | .   | .   | .   | . | . | . |
| Hap_20        | 0.17%     | Chile                | . | . | .  | .  | .  | .  | .  | G  | .  | .  | .   | .   | .   | .   | .   | .   | .   | .   | .   | .   | .   | .   | .   | .   | .   | .   | .   | .   | .   | .   | .   | .   | .   | .   | .   | .   | .   | .   | .   | .   | .   | . | . | . |
| Hap_21        | 0.68%     | Chile, NSW           | . | . | .  | .  | .  | .  | .  | .  | .  | .  | .   | .   | .   | .   | .   | .   | .   | .   | .   | .   | .   | .   | .   | .   | .   | G   | .   | .   | .   | .   | .   | .   | .   | .   | .   | .   | .   | .   | .   | .   | .   | . | . | . |
| Hap_22        | 0.17%     | Chile                | . | . | .  | A  | .  | .  | .  | .  | .  | .  | .   | .   | .   | .   | .   | .   | .   | .   | .   | .   | .   | .   | .   | .   | .   | .   | .   | .   | .   | .   | .   | .   | .   | .   | .   | .   | .   | .   | .   | .   | .   | . | . | . |
| Hap_23        | 0.17%     | Chile                | . | . | .  | .  | .  | .  | .  | .  | .  | .  | .   | .   | .   | .   | .   | .   | .   | .   | .   | .   | .   | .   | .   | .   | .   | .   | .   | .   | .   | .   | .   | .   | .   | .   | .   | G   | .   | .   | .   | .   | .   | . | . | . |
| Hap_24        | 0.17%     | Chile                | . | . | .  | .  | .  | .  | .  | .  | .  | .  | .   | .   | .   | .   | T   | .   | .   | .   | .   | .   | .   | .   | .   | .   | .   | .   | .   | .   | .   | .   | .   | .   | .   | .   | .   | .   | .   | .   | .   | .   | .   | . | . | . |
| Hap_25        | 0.34%     | Chile, NSW           | . | . | .  | .  | .  | .  | .  | .  | .  | .  | .   | .   | C   | .   | .   | .   | .   | .   | .   | .   | .   | .   | .   | .   | .   | .   | T   | .   | .   | .   | .   | .   | .   | .   | .   | .   | .   | .   | .   | .   | .   | . | . | . |
| Hap_26        | 0.17%     | Chile                | . | . | .  | .  | .  | .  | .  | .  | .  | .  | .   | .   | .   | .   | .   | .   | .   | .   | .   | .   | .   | .   | .   | C   | .   | .   | .   | .   | .   | .   | .   | .   | .   | .   | .   | .   | .   | .   | .   | .   | .   | . | . | . |
| Hap_27        | 0.17%     | NSW                  | . | . | .  | .  | .  | .  | .  | .  | .  | .  | .   | A   | .   | .   | .   | .   | .   | .   | .   | .   | .   | .   | .   | .   | .   | .   | .   | C   | .   | .   | .   | .   | .   | .   | .   | .   | .   | .   | .   | .   | .   | . | . | . |
| Hap_28        | 0.34%     | SA                   | C | A | .  | .  | .  | C  | .  | .  | .  | .  | .   | .   | .   | .   | T   | .   | .   | .   | .   | .   | .   | .   | .   | .   | .   | T   | .   | .   | .   | .   | .   | .   | .   | .   | .   | .   | .   | .   | .   | .   | .   | . | . | . |
| Hap_29        | 0.34%     | South Africa         | . | A | .  | .  | .  | .  | .  | .  | .  | .  | .   | .   | .   | .   | T   | .   | .   | G   | .   | .   | .   | .   | .   | .   | .   | .   | .   | .   | .   | .   | .   | .   | .   | .   | .   | .   | .   | .   | .   | .   | .   | . | . | . |
| Hap_30        | 0.17%     | South Africa         | . | A | .  | .  | C  | .  | .  | .  | .  | .  | .   | .   | .   | .   | T   | .   | .   | G   | .   | .   | .   | .   | .   | .   | .   | .   | .   | .   | .   | .   | .   | .   | .   | .   | .   | .   | .   | .   | .   | .   | .   | . | . | . |
| Hap_31        | 0.17%     | South Africa         | . | A | .  | .  | .  | .  | .  | .  | .  | A  | .   | .   | .   | .   | T   | .   | .   | .   | .   | .   | .   | .   | .   | .   | .   | .   | .   | .   | .   | .   | .   | .   | .   | C   | .   | .   | .   | .   | .   | .   | .   | . | . | . |

Abbreviations: New South Wales (NSW); South Australia (SA); New Zealand (NZ); South Africa (S\_Af).

Haplotype numbers (column 1) are generated by Arlequin software analyses for this particular Table and do not correspond to those haplotype names given elsewhere.

**Supplementary Table 2.** Estimates of genetic diversity indices based on published and present mtDNA COI sequences.

| Population | mtDNA COI |                |       |                |
|------------|-----------|----------------|-------|----------------|
|            | n         | n <sub>h</sub> | π (%) | <i>h</i> (±SD) |
| Japan      | 25        | 3              | 0.068 | 0.397 ± 0.10   |
| China      | 2         | 1              | 0.000 | 0.000 ± 0.00   |
| USA        | 30        | 3              | 0.064 | 0.246 ± 0.09   |
| Mexico     | 94        | 6              | 0.137 | 0.532 ± 0.05   |
| Chile      | 343       | 17             | 0.052 | 0.257 ± 0.07   |
| NSW        | 50        | 7              | 0.114 | 0.388 ± 0.08   |
| SA         | 29        | 3              | 0.148 | 0.256 ± 0.10   |
| NZ         | 2         | 1              | 0.000 | 0.000 ± 0.00   |
| S_Africa   | 10        | 4              | 0.177 | 0.644 ± 0.15   |

Abbreviations: Sample size (*n*), number of haplotypes (*n<sub>h</sub>*), nucleotide diversity (*π*), haplotype diversity (*h*), standard deviation (SD), New South Wales (NSW), South Australia (SA), New Zealand (NZ), South Africa (S\_Africa).

**Supplementary Table 3.** Pairwise population matrix of  $F_{ST}$  based on published and present mtDNA COI sequences.

|          | Japan  | China  | USA    | Mexico | Chile  | NSW    | SA     | NZ     |
|----------|--------|--------|--------|--------|--------|--------|--------|--------|
| Japan    |        |        |        |        |        |        |        |        |
| China    | -0.162 |        |        |        |        |        |        |        |
| USA      | 0.684* | 0.775* |        |        |        |        |        |        |
| Mexico   | 0.514* | 0.534* | 0.045* |        |        |        |        |        |
| Chile    | 0.717* | 0.759* | 0.745* | 0.657* |        |        |        |        |
| NSW      | 0.609* | 0.652* | 0.670* | 0.528* | 0.011  |        |        |        |
| SA       | 0.677* | 0.766* | 0.749* | 0.563* | 0.003  | -0.002 |        |        |
| NZ       | 0.650* | 1.000  | 0.775* | 0.534* | -0.260 | -0.221 | -0.265 |        |
| S_Africa | 0.512* | 0.480* | 0.625* | 0.435* | 0.511* | 0.510* | 0.598* | 0.480* |

\*  $P < 0.05$ .

Abbreviations: New South Wales (NSW), South Australia (SA), New Zealand (NZ), South Africa (S\_Africa).

**Supplementary Table 4.** Estimates of pairwise sequence divergence based on published and present mtDNA COI sequences between populations and other *Seriola* species (all values are in percentages).

|                     | China | USA  | Mexico | Chile | NSW  | SA   | NZ   | S_Africa | <i>S. dumerili</i> | <i>S. rivoliana</i> | <i>S. zonata</i> | <i>S. fasciata</i> | <i>S. quinquerediata</i> |
|---------------------|-------|------|--------|-------|------|------|------|----------|--------------------|---------------------|------------------|--------------------|--------------------------|
| Japan               | 0.05  | 1.77 | 1.79   | 2.43  | 2.40 | 2.41 | 2.42 | 2.16     | 9.47               | 10.13               | 4.57             | 10.02              | 5.72                     |
| China               |       | 1.73 | 1.75   | 2.39  | 2.37 | 2.38 | 2.40 | 2.12     | 9.43               | 10.10               | 4.53             | 10.00              | 5.70                     |
| USA                 |       |      | 0.11   | 2.36  | 2.34 | 2.36 | 2.37 | 2.04     | 9.80               | 11.41               | 4.54             | 9.69               | 6.33                     |
| Mexico              |       |      |        | 2.33  | 2.31 | 2.33 | 2.34 | 2.05     | 9.80               | 11.41               | 4.54             | 9.68               | 6.35                     |
| Chile               |       |      |        |       | 0.10 | 0.12 | 0.03 | 0.49     | 8.94               | 10.54               | 3.37             | 9.20               | 5.51                     |
| NSW                 |       |      |        |       |      | 0.15 | 0.07 | 0.48     | 8.93               | 10.53               | 3.36             | 9.18               | 5.50                     |
| SA                  |       |      |        |       |      |      | 0.09 | 0.46     | 8.88               | 10.48               | 3.34             | 9.18               | 5.49                     |
| NZ                  |       |      |        |       |      |      |      | 0.48     | 8.93               | 10.53               | 3.37             | 9.20               | 5.50                     |
| S_Africa            |       |      |        |       |      |      |      |          | 8.66               | 10.28               | 3.10             | 8.88               | 5.28                     |
| <i>S. dumerili</i>  |       |      |        |       |      |      |      |          |                    | 6.49                | 9.43             | 11.30              | 9.70                     |
| <i>S. rivoliana</i> |       |      |        |       |      |      |      |          |                    |                     | 11.16            | 11.17              | 10.23                    |
| <i>S. zonata</i>    |       |      |        |       |      |      |      |          |                    |                     |                  | 9.40               | 6.50                     |
| <i>S. fasciata</i>  |       |      |        |       |      |      |      |          |                    |                     |                  |                    | 9.20                     |

Abbreviations: New South Wales (NSW), South Australia (SA), New Zealand (NZ), South Africa (S\_Africa).

**Supplementary Table 5.** Diversity array (DArT) markers unique for each population and hemispheres (NH = Northern Hemisphere; SP = South Pacific).

| DArT_tag | Tag sequence is unique to these regions | Tag_sequence                                                           | Mean of the presence/absence (1/0) of tags in populations |        |       |       |    |
|----------|-----------------------------------------|------------------------------------------------------------------------|-----------------------------------------------------------|--------|-------|-------|----|
|          |                                         |                                                                        | Japan                                                     | Mexico | Chile | NSW   | SA |
| 13781242 | Japan                                   | TGCAGAGTGTTCCTCCTCCTCCTCCTCCTCCTCAGGAACCTGTATATCCTAAAGACAGTATGGTTGAG   | 1                                                         | 0      | 0     | 0     | 0  |
| 13783891 | Japan                                   | TGCAGGTAATCAAAAAATAAAGTTCTTTTTTTGAATGCATGAGATCGGAAGAGCGGTTCAGCAGGAAT   | 1                                                         | 0      | 0     | 0     | 0  |
| 13782960 | Japan                                   | TGCAGCATAAGGCTCCCATATCATGTCCGCAATTCATTATGAGCGCTGTAGTATCATGTGTGTCTGTG   | 1                                                         | 0      | 0     | 0.021 | 0  |
| 13792414 | Mexico                                  | TGCAGAGCTTTTTCTCCACTTCTGACAGAGCCAGTCCAAATCCTCATGGTGATCAGATGTGTCCCTTG   | 0                                                         | 0.973  | 0     | 0     | 0  |
| 13799763 | Mexico                                  | TGCAGTGGACATATCAGTTCAGTTATGCATGAGATCGGAAGAGCGGTTTCAGCAGGAATGCCGAGACCGA | 0                                                         | 1      | 0     | 0     | 0  |
| 13788627 | Mexico                                  | TGCAGCCCAGCAGTTGCTGTACTAATGTCAGCATGAGATCGGAAGAGCGGTTTCAGCAGGAATGCCGAGA | 1                                                         | 0      | 1     | 1     | 1  |
| 13800576 | NH                                      | TGCAGCGTGCATGTGTGTGTGTGTGCGCACATCCACACGTTTGTGCATTTGTGCATGAGATCGGAAGAG  | 1                                                         | 1      | 0     | 0.044 | 0  |
| 13792462 | NH                                      | TGCAGTGAAGTTCTTGAAGAGTACACACAGAAGAGACACAATCTTTTCTAACTCACTTCTTCTTAACAC  | 1                                                         | 1      | 0     | 0.022 | 0  |
| 13780593 | NH                                      | TGCAGTGAGTCGCTATCAGAAAAGTGACAAGGTGGGCCGGGCTAGCGGGTCAGCATGAGATCGGAAGAGC | 1                                                         | 1      | 0     | 0     | 0  |
| 13801331 | NH                                      | TGCAGTCTAGAGTGCAGCTGCACACCCTCCAACAGATGAGCTGTGTGTGTGTGTGTGTGTGTGTGTG    | 1                                                         | 1      | 0     | 0     | 0  |
| 13781048 | NH                                      | TGCAGTGTCTCACACACACACACACATGCGCACGCATGAGATCGGAAGAGCGGTTTCAGCAGGAATGC   | 1                                                         | 1      | 0     | 0     | 0  |
| 13781029 | NH                                      | TGCAGTTTTTTATAATGCAACCTACCATACAAAAATAATGTAGAAATGGCTGCTCCTTGGCCTTGGAAG  | 1                                                         | 1      | 0     | 0     | 0  |
| 13789043 | NH                                      | TGCAGCCCTAACTTCAGCTTGCAGTACAAATATTATAATTATGCATGAGATCGGAAGAGCGGTTTCAGCA | 1                                                         | 1      | 0     | 0     | 0  |
| 13780998 | NH                                      | TGCAGAAAACACACTTTGAGGATGACGACTGCTAACAACACACAAAGACACACAGAGACTGCTATGTTT  | 1                                                         | 1      | 0     | 0     | 0  |
| 13799426 | NH                                      | TGCAGCGAGAAGTTGTCAAATAACAAAACAAGCAATGTGGAAAAGACATTTCCAGGGAAGGCATGAGATC | 1                                                         | 1      | 0     | 0     | 0  |
| 13799781 | NH                                      | TGCAGACCAAATCCCAGGCATGAGATCGGAAGAGCGGTTTCAGCAGGAATGCCGAGACCGATCTCGTATG | 1                                                         | 1      | 0     | 0     | 0  |
| 13802148 | NH                                      | TGCAGGAGTGAAACGGCCGGTTTGGAGTCTGTCTGTGAACATAGAGCAGTGGGCAAAAGAGTTTTAGGGA | 1                                                         | 1      | 0     | 0     | 0  |
| 20270489 | NH                                      | TGCAGCGGCAACATCTCCACACAGGGATGTACCCGTCGTATGATGGCTCACACTGGTACTGCCTCTTC   | 1                                                         | 1      | 0     | 0     | 0  |
| 20270139 | NH                                      | TGCAGGCCACAAACACACAAACACACACACACACACAGACACGCAGCCTGTGCAGAGGTGGCACTAC    | 1                                                         | 0.973  | 0     | 0     | 0  |
| 13792461 | NH                                      | TGCAGCGCTCTGGGGAGAGAGCTGTTTGACAATAAACCCAGCATACTGCACATGCAGCCGCTGTGT     | 1                                                         | 1      | 0     | 0     | 0  |
| 13781010 | NH                                      | TGCAGCTGACTGACAGCTCACAGGAATAAGGCTTTTTTCTGGTTTTCCGTCCTCCTTGAAACCCATCCAT | 1                                                         | 0.974  | 0     | 0     | 0  |
| 13793289 | NH                                      | TGCAGTCTGGGACTCGATGTGCATGTGAGAGGGTTTGCATGAGATCGGAAGAGCGGTTTCAGCAGGAAT  | 1                                                         | 1      | 0     | 0     | 0  |
| 13793383 | NH                                      | TGCAGCTTTTACAGAAAACCTCAATGAAAAGTATTCACTACAAGACAGAGGTGATGTTTTATAATATCA  | 1                                                         | 1      | 0     | 0     | 0  |
| 13788043 | NH                                      | TGCAGCTACGTATATTGATGAGGGACAGCAACAATGAACTTAAGTCAAAATATCTGCATTTTCTATGTA  | 1                                                         | 1      | 0     | 0     | 0  |
| 13781282 | NH                                      | TGCAGTGTCTCACACACACACACATGCGCACGCATGAGATCGGAAGAGCGGTTTCAGCAGGAATGCCG   | 1                                                         | 1      | 0     | 0     | 0  |
| 20269361 | NH                                      | TGCAGTGTACGTTAACGTACAGAGCTGCATCATTTCCAATGTAATTGATGCTCACACACATTTGTTTTCT | 1                                                         | 1      | 0     | 0     | 0  |
| 13788845 | SP                                      | TGCAGTGAGTGCCGCATGTCTCTTGAGCATGAGATCGGAAGAGCGGTTTCAGCAGGAATGCCGAGACCG  | 0                                                         | 0      | 1     | 0.957 | 1  |
| 13792781 | SP                                      | TGCAGCAAACGAAGGCGAAGTTGAATTTTGCATGAGATCGGAAGAGCGGTTTCAGCAGGAATGCCGAGA  | 0                                                         | 0      | 1     | 1     | 1  |

**Supplementary Table 6.** PCR primers used for microsatellite genotyping.

| <b>Primer</b> | <b>Forward sequence (5'-3')</b> | <b>Reverse sequence (5'-3')</b> |
|---------------|---------------------------------|---------------------------------|
| Sel001        | GAGCTGTGGAACAGGAAACC            | CATCCTGGGTACAGGAGCAG            |
| Sel002        | ATCAGAAATGGACCGAGGTG            | TGGTCCTCCGAGAAAGACTC            |
| Sel008        | TGTGGGGAAC TGTGTTTTCA           | AGAGGACAGAGCCAACTTGC            |
| Sel011        | TTCAAGAGTCATCAACATCATCG         | GCAAAGCTGAAAGGCAAAGT            |
| Sel017        | CAGGGCAGAGGGAGAAGTTA            | GGTTACCAGGACGGCTATCA            |
| Sel019        | CTATGGCCTCATTCCAGTGC            | AAGTACCACAGTGCCCAAGG            |

Primers Sel001 – Sel019. Methods to isolate primers are given in Whatmore *et al.*<sup>1</sup>.

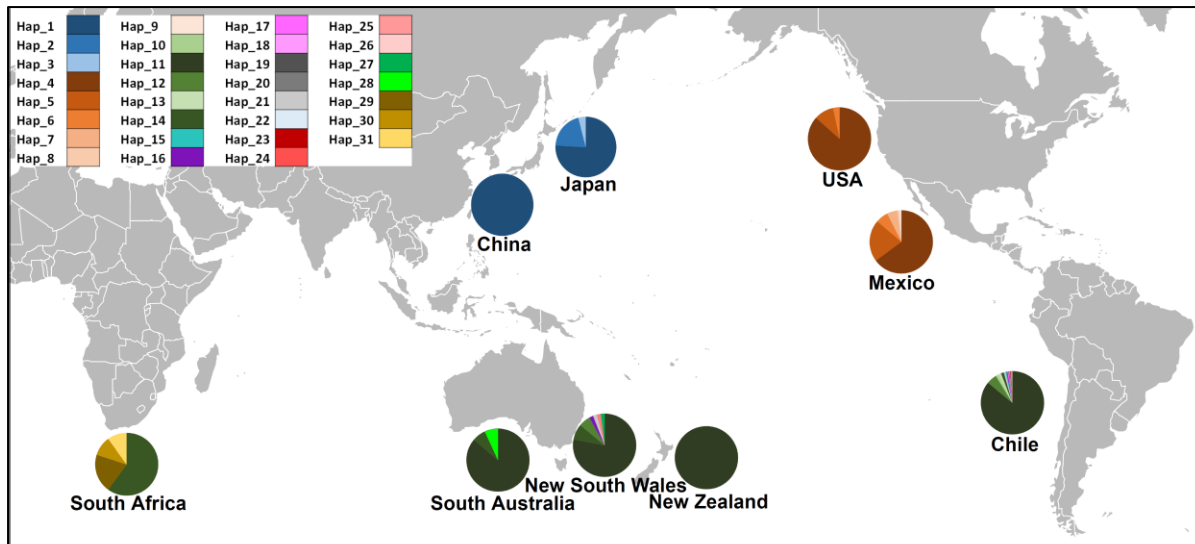

**Supplementary Figure 1.** mtDNA haplotype distributions using data of the present study pooled with published data . Maps available from Wikipedia Common web page ([https://commons.wikimedia.org/wiki/File:Blank\\_Map\\_Pacific\\_World.svg#filelinks](https://commons.wikimedia.org/wiki/File:Blank_Map_Pacific_World.svg#filelinks)) were modified under the Creative Commons public license (<https://creativecommons.org/licenses/by-sa/3.0/deed.en>) using Adobe Photoshop CS6 software.



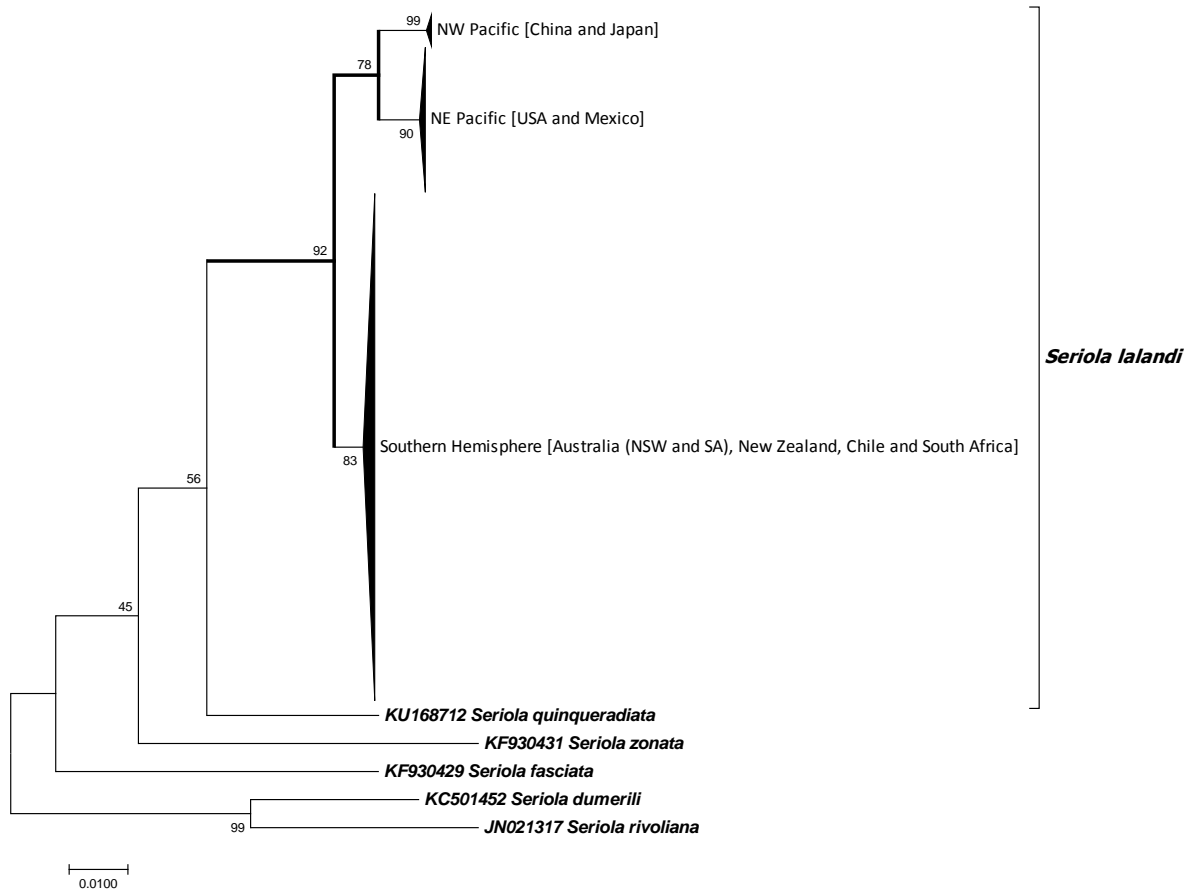

**Supplementary Figure 2.** The maximum-likelihood (ML) phylogeny considering mtDNA COI sequences from the present report, published sequences and sequences from other *Seriola* species. The ML bootstrap percentages are shown above the branches and GenBank accession numbers for related species are shown with taxa label.

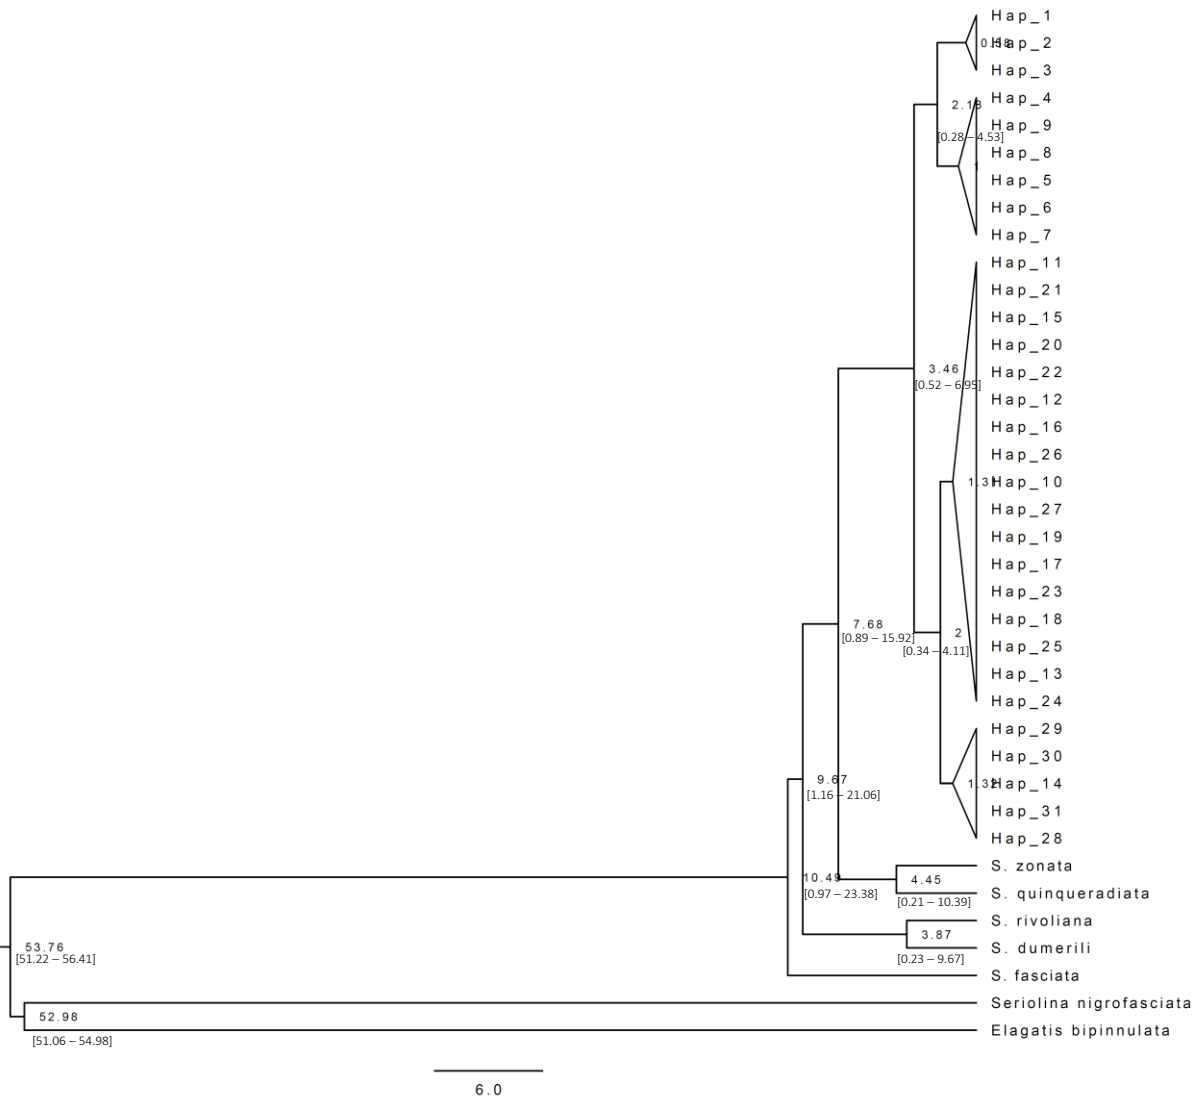

**Supplementary Figure 3.** Divergence times estimated for mtDNA COI (present and published data) from Bayesian inferences in BEAST. Mean divergence times are indicated next to the nodes and 95% highest posterior density values (HPD) are indicated in parenthesis. The sample locations for Hap\_1 – Hap\_31 are given in Supplementary Table1.

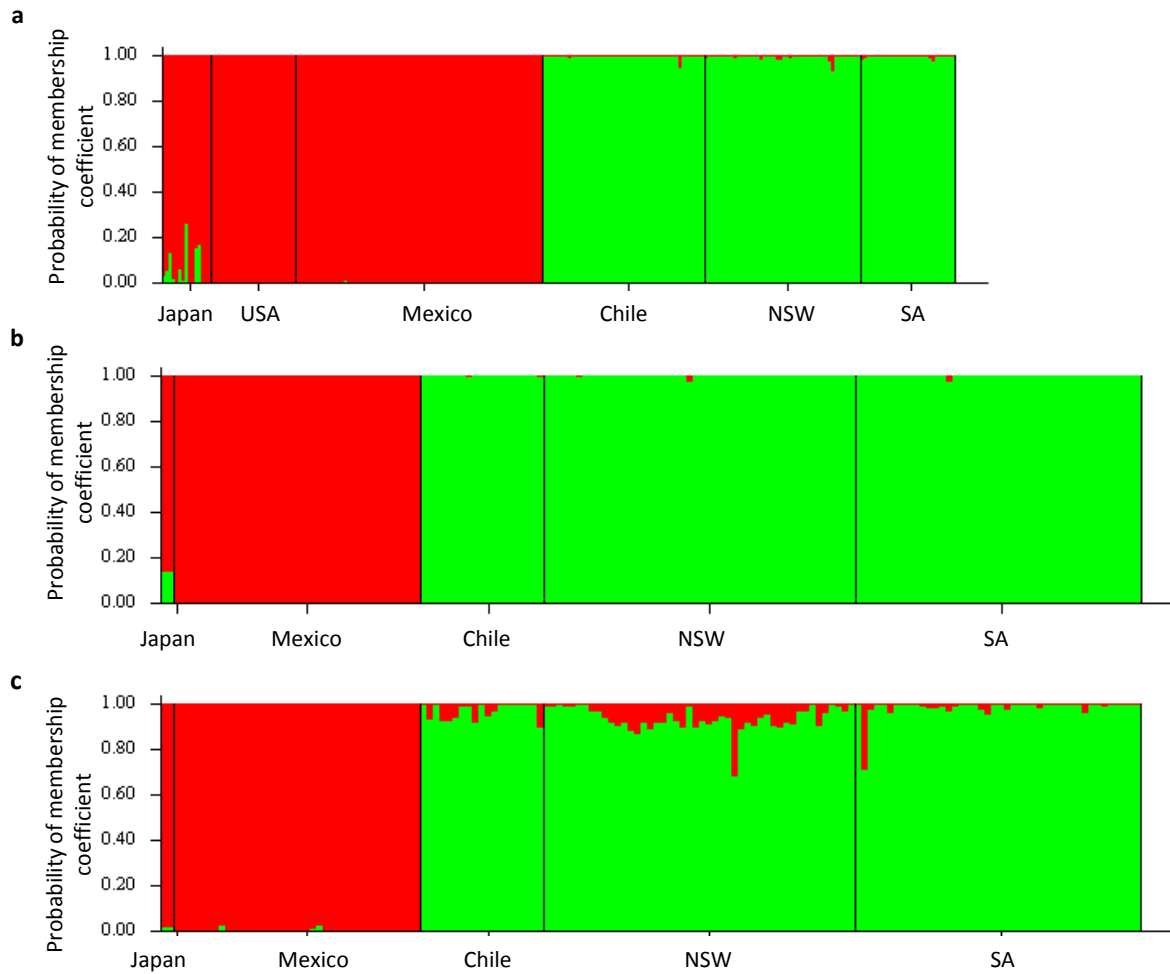

**Supplementary Figure 4.** Cluster analysis from STRUCTURE for a) microsatellite, b) SNPs and c) DArT markers at  $K = 2$ .

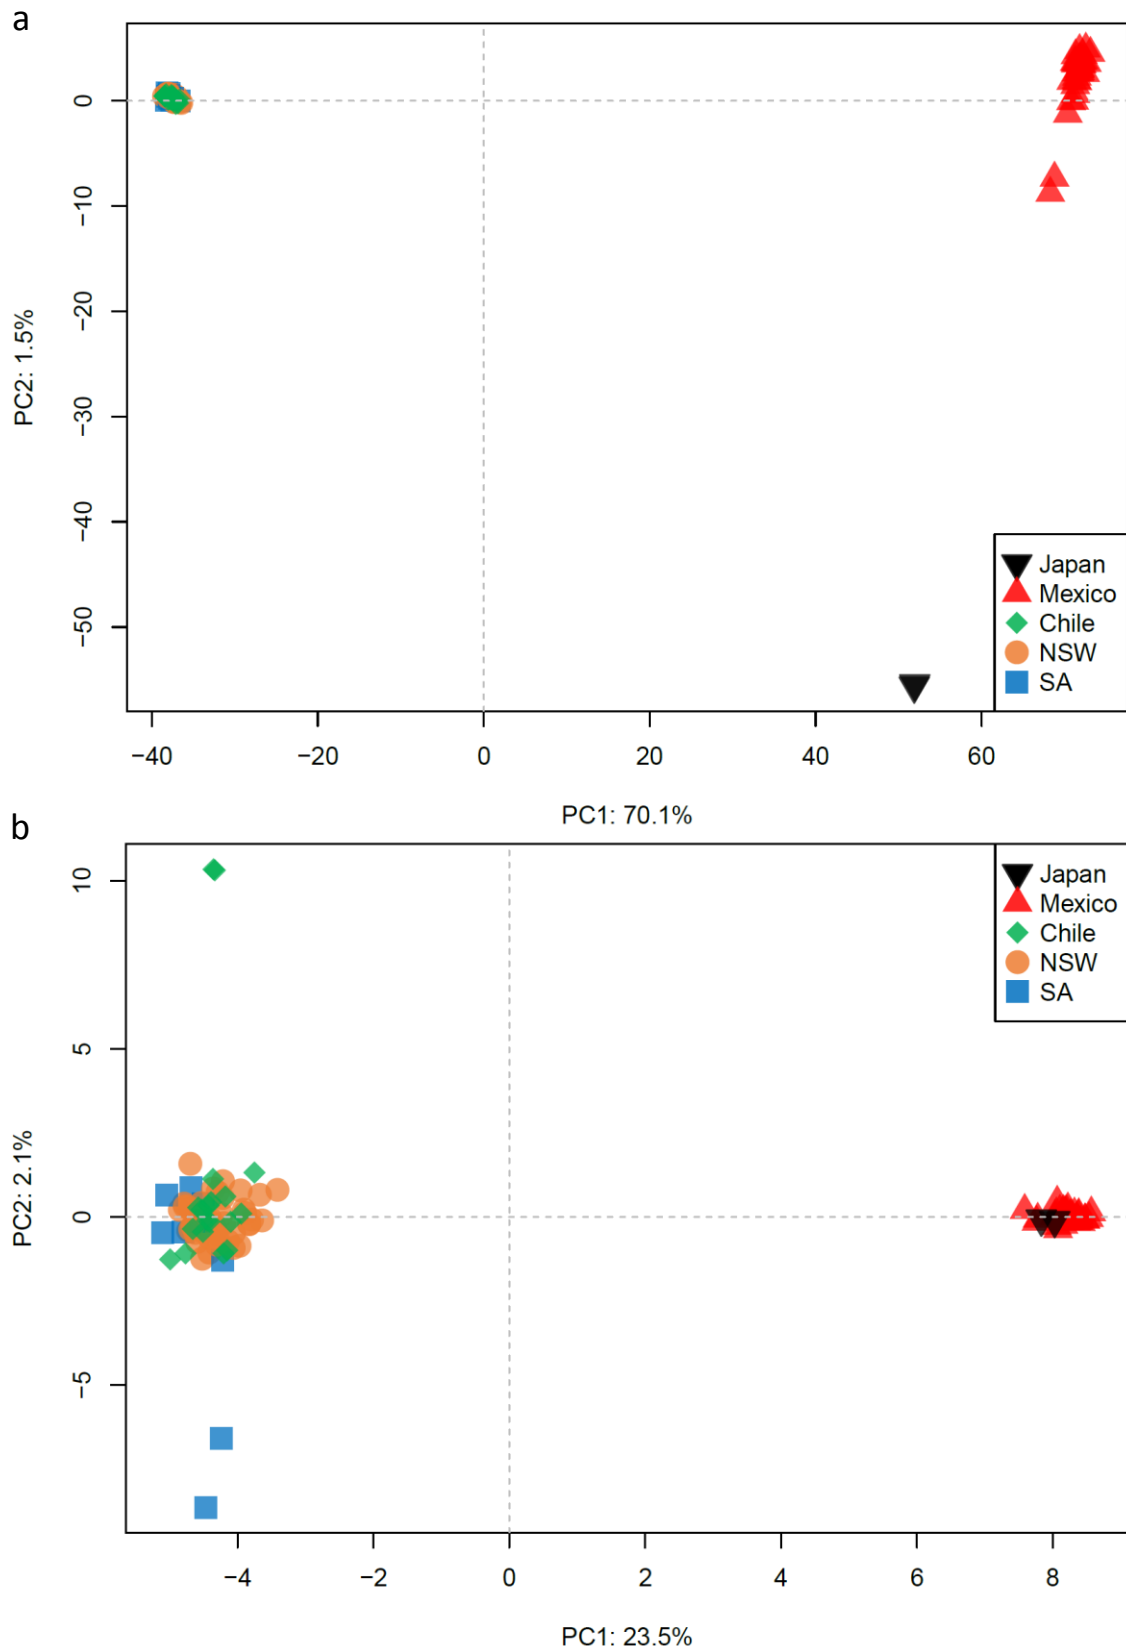

**Supplementary Figure 5.** Individual relationships within and between populations derived from principal component analysis (PCA) for a) SNPs and b) DArT markers.

## Reference

- 1 Whatmore, P. *et al.* Genetic parameters for economically important traits in yellowtail kingfish *Seriola lalandi*. *Aquaculture* **400-401**, 77-84 (2013).
